# Supplementary material
Source: PubMed Central journal article supplement (PMC6771927)
Supplement: NIHMS1022340-supplement-supplement.pdf [file NIHMS1022340-supplement-supplement.pdf]

NOTE REGARDING SUPPLEMENTARY MATERIALS:

Supplementary materials of this paper contain photographic images crawled from the internet. For academic research purposes, they are available upon request from the authors. Contact Prof. James Wang of Penn State University for more information ([jwang@ist.psu.edu](mailto:jwang@ist.psu.edu)).
